# Supplementary material for: A prompt based approach for apple disease classification
Source: Research Square preprint supplement (doi:10.21203/rs.3.rs-1308089/v1), 2022-02-21
Supplement: Supplementary file 1 [file 026fe65310ff038db0e6f023.xlsx]

## Sheet: Sheet1
NetWork	Type	Disease	Accuracy(%)	Precision(%)	Recall(%)	F1-score(%)
Clip-RN50(based on ImageNet)	Apple	Healthy	-	-	-	-
		Ring Rot	-	-	-	-
		Anthracnose	-	-	-	-
Clip-RN50(based on PlantVillage)	Apple	Healthy	29.3	14.65	50	22.66
		Ring Rot	36.55	18.28	50	26.77
		Anthracnose	1.18	0.39	33.33	0.78
Clip-RN50(based on PlantDoc)	Apple	Healthy	98.73	49.36	50	49.68
		Ring Rot	42.76	14.25	33.33	19.98
		Anthracnose	1.18	0.39	33.33	0.78
Clip-ViT-B/16(based on ImageNet)	Apple	Healthy	-	-	-	-
		Ring Rot	-	-	-	-
		Anthracnose	-	-	-	-
Clip-ViT-B/16(based on PlantVillage)	Apple	Healthy	85.35	42.68	50	46.05
		Ring Rot	85.52	28.51	33.33	30.73
		Anthracnose	57.65	19.22	33.33	24.38
Clip-ViT-B/16(based on PlantDoc)	Apple	Healthy	100	100	100	100
		Ring Rot	63.45	21.15	33.33	25.88
		Anthracnose	19.42	6.47	33.33	10.84
Clip-ViT-B/32(based on ImageNet)	Apple	Healthy	-	-	-	-
		Ring Rot	-	-	-	-
		Anthracnose	-	-	-	-
Clip-ViT-B/32(based on PlantVillage)	Apple	Healthy	28.03	14.01	50	21.89
		Ring Rot	95.86	47.93	50	48.94
		Anthracnose	12.94	4.31	33.33	7.64
Clip-ViT-B/32(based on PlantDoc)	Apple	Healthy	100	100	100	100
		Ring Rot	9.66	3.22	33.33	5.87
		Anthracnose	29.41	9.8	33.33	15.15
Clip-RN50(based on ImageNet)	Leaf	Healthy	-	-	-	-
		Anthracnose	-	-	-	-
		Rust	-	-	-	-
Clip-RN50(based on PlantVillage)	Leaf	Healthy	100	100	100	100
		Anthracnose	0	0	0	0
		Rust	0	0	0	0
Clip-RN50(based on PlantDoc)	Leaf	Healthy	90.91	30.3	33.33	31.75
		Anthracnose	3.46	1.15	33.33	2.23
		Rust	74.49	24.96	33.33	28.55
Clip-ViT-B/16(based on ImageNet)	Leaf	Healthy	-	-	-	-
		Anthracnose	-	-	-	-
		Rust	-	-	-	-
Clip-ViT-B/16(based on PlantVillage)	Leaf	Healthy	78.79	39.39	50	44.07
		Anthracnose	97	32.33	33.33	32.83
		Rust	7.49	2.5	33.33	4.64
Clip-ViT-B/16(based on PlantDoc)	Leaf	Healthy	89.39	44.7	50	47.2
		Anthracnose	1.38	0.46	33.33	0.91
		Rust	93.83	31.28	33.33	32.27
Clip-ViT-B/32(based on ImageNet)	Leaf	Healthy	-	-	-	-
		Anthracnose	-	-	-	-
		Rust	-	-	-	-
Clip-ViT-B/32(based on PlantVillage)	Leaf	Healthy	57.58	19.19	33.33	24.36
		Anthracnose	35.02	11.67	33.33	17.29
		Rust	33.48	11.16	33.33	16.72
Clip-ViT-B/32(based on PlantDoc)	Leaf	Healthy	89.39	29.8	33.33	31.47
		Anthracnose	3.69	1.23	33.33	2.37
		Rust	87.22	29.07	33.33	31.06
