# Supplementary material for: A prompt based approach for apple disease classification
Source: Research Square preprint supplement (doi:10.21203/rs.3.rs-1308089/v1), 2022-02-21
Supplement: Supplementary file 2 [file b0dc013bff4f8e6232826692.xlsx]

## Sheet: Sheet1
NetWork	Type	Disease	Accuracy(%)	Precision(%)	Recall(%)	F1-score(%)
Clip-RN50(based on ImageNet)	Apple	Healthy	38.22	12.74	33.33	18.43
		Ring Rot	91.03	30.34	33.33	31.77
		Anthracnose	63.37	21.12	33.33	25.86
Clip-RN50(based on PlantVillage)	Apple	Healthy	89.17	29.72	33.33	31.43
		Ring Rot	4.828	1.61	33.33	3.07
		Anthracnose	30	10	33.33	15.38
Clip-RN50(based on PlantDoc)	Apple	Healthy	98.09	49.04	50	49.52
		Ring Rot	28.28	9.43	33.33	14.7
		Anthracnose	0.58	0.196	33.33	0.39
Clip-ViT-B/16(based on ImageNet)	Apple	Healthy	41.02	27.01	33.33	31.58
		Ring Rot	92.76	46.38	50	50.28
		Anthracnose	59.88	19.96	33.33	24.97
Clip-ViT-B/16(based on PlantVillage)	Apple	Healthy	85.35	28.45	33.33	30.7
		Ring Rot	88.28	29.43	33.33	31.26
		Anthracnose	28.82	14.41	50	22.37
Clip-ViT-B/16(based on PlantDoc)	Apple	Healthy	85.35	42.68	50	46.05
		Ring Rot	67.59	22.53	33.33	26.89
		Anthracnose	4.118	1.37	33.33	2.64
Clip-ViT-B/32(based on ImageNet)	Apple	Healthy	56.69	18.9	33.33	24.12
		Ring Rot	67.59	22.53	33.33	26.89
		Anthracnose	88.37	29.46	33.33	31.28
Clip-ViT-B/32(based on PlantVillage)	Apple	Healthy	82.74	27.52	33.33	29.41
		Ring Rot	78.28	28.49	33.33	30.14
		Anthracnose	29.12	13.69	33.33	20.97
Clip-ViT-B/32(based on PlantDoc)	Apple	Healthy	100	100	100	100
		Ring Rot	19.31	6.44	33.33	10.79
		Anthracnose	21.76	7.25	33.33	11.92
Clip-RN50(based on ImageNet)	Leaf	Healthy	87.88	43.94	50	46.77
		Anthracnose	26.21	8.74	33.33	13.84
		Rust	0.88	0.29	33.33	0.58
Clip-RN50(based on PlantVillage)	Leaf	Healthy	89.39	29.8	33.33	31.47
		Anthracnose	11.98	3.99	33.33	7.13
		Rust	34.36	11.45	33.33	17.05
Clip-RN50(based on PlantDoc)	Leaf	Healthy	86.36	28.79	33.33	30.89
		Anthracnose	4.15	1.38	33.33	2.65
		Rust	87.67	29.22	33.33	31.14
Clip-ViT-B/16(based on ImageNet)	Leaf	Healthy	63.63	31.82	50	38.89
		Anthracnose	65.98	21.99	33.33	26.5
		Rust	6.58	2.19	33.33	4.11
Clip-ViT-B/16(based on PlantVillage)	Leaf	Healthy	89.39	44.7	50	47.2
		Anthracnose	95.62	31.87	33.33	32.59
		Rust	9.251	3.08	33.33	5.64
Clip-ViT-B/16(based on PlantDoc)	Leaf	Healthy	96.97	48.48	50	49.23
		Anthracnose	26.73	8.91	33.33	14.06
		Rust	77.53	25.84	33.33	29.11
Clip-ViT-B/32(based on ImageNet)	Leaf	Healthy	54.55	27.27	50	35.29
		Anthracnose	69.89	23.3	33.33	27.42
		Rust	6.58	2.19	33.33	4.12
Clip-ViT-B/32(based on PlantVillage)	Leaf	Healthy	88.48	44.24	50	32.65
		Anthracnose	84.61	22.3	33.33	4.41
		Rust	25.12	2.68	33.33	0
Clip-ViT-B/32(based on PlantDoc)	Leaf	Healthy	95.45	31.82	33.33	32.56
		Anthracnose	8.06	2.69	33.33	4.98
		Rust	81.5	27.17	33.33	29.94
